# Supplementary material
Source: HighWire-hosted journal article supplement (https://bmjopen.bmj.com/content/15/4/e090966)
Supplement: inline-supplementary-material-1 [file inline-supplementary-material-1.pdf]

Supplementary

Table S1 Analysis of missing data, including the percentages of respondents who responded only in 2021 to those responding in both 2021 and 2022. Data for 2021.

|                                | Only responded in 2021 (%) | Responded in both 2021 and 2022 (%) |
|--------------------------------|----------------------------|-------------------------------------|
| Total Share (%)                | 12.9                       | 17.9                                |
| Women                          | 54.0                       | 56.1                                |
| Men                            | 46.0                       | 43.9                                |
| Working with Covid-19 patients |                            |                                     |
| all the time                   | 48.9                       | 55.3                                |
| part of the time               | 23.0                       | 22.3                                |
| at no time                     | 28.1                       | 22.4                                |
| Adverse life events            | 20.5                       | 18.2                                |
| No adverse life events         | 79.5                       | 81.1                                |
| Working hours                  |                            |                                     |
| less than 36 hours             | 47.4                       | 53.2                                |
| 36-45 hours                    | 23.0                       | 17.2                                |
| More than 45 hours             | 29.6                       | 29.6                                |
| Healthcare facility            |                            |                                     |
| Primary care                   | 38.5                       | 41.6                                |
| Hospital care                  | 49.2                       | 53.2                                |
| Other                          | 12.3                       | 5.2                                 |
| Hierarchical position          |                            |                                     |
| Physicians in training         | 29.4                       | 30.8                                |
| Specialists                    | 39.7                       | 40.1                                |
| Consultants                    | 30.8                       | 29.1                                |
| Burnout in 2021                | 5.8                        | 4.7                                 |
| Depression in 2021             | 4.5                        | 3.7                                 |
| ACMCSA                         | 11.8                       | 9.3                                 |

Table S2. Logistic regression analyses testing the association between baseline severe burnout, exhaustion, mental distance, emotional impairment, cognitive impairment and major depression and any all-cause medically certified sickness absence exceeding 14 days the following year.

|                              | Univariate |           |         | Model A |           |         | Model B |           |         |
|------------------------------|------------|-----------|---------|---------|-----------|---------|---------|-----------|---------|
|                              | OR         | 95%CI     | p-value | OR      | 95%CI     | p-value | OR      | 95%CI     | p-value |
| N                            |            |           |         | 1465    |           |         | 1477    |           |         |
| Severe burnout               | 2.13       | 1.74-5.63 | <0.001  | 2.57    | 1.27-5.23 | 0.009   |         |           |         |
| Exhaustion                   | 2.48       | 1.62-3.79 | <0.001  |         |           |         | 1.80    | 1.03-3.15 | 0.040   |
| Mental distance              | 0.92       | 0.33-2.61 | 0.382   |         |           |         | 0.40    | 0.12-1.35 | 0.141   |
| Emotional impairment         | 3.72       | 1.88-7.36 | <0.001  |         |           |         | 2.13    | 0.89-5.08 | 0.090   |
| Cognitive impairment         | 4.69       | 2.54-8.67 | <0.001  |         |           |         | 2.52    | 1.12-5.50 | 0.025   |
| Major depression             | 2.45       | 1.24-4.84 | 0.010   | 1.62    | 0.70-3.73 | 0.262   | 1.13    | 0.47-2.73 | 0.790   |
| <i>Working with COVID-19</i> |            |           |         |         |           |         |         |           |         |
| all the time                 | 0.60       | 0.40-0.91 | 0.017   | 0.59    | 0.37-0.95 | 0.029   | 0.61    | 0.38-0.99 | 0.047   |
| part of the time             | 1.06       | 0.67-1.69 | 0.793   | 0.97    | 0.59-1.62 | 0.918   | 0.99    | 0.59-1.66 | 0.971   |
| No                           | 1          |           |         | 1       |           |         | 1       |           |         |
| <i>Work hours</i>            |            |           |         |         |           |         |         |           |         |
| less than 35 h               | 1.14       | 0.72-1.79 | 0.580   | 0.84    | 0.50-1.42 | 0.512   | 0.88    | 0.52-1.49 | 0.632   |
| 35-45 h                      | 1          |           |         | 1       |           |         | 1       |           |         |
| More than 45 h               | 0.95       | 0.64-1.42 | 0.818   | 1.02    | 0.66-1.57 | 0.923   | 1.00    | 0.65-1.56 | 0.986   |
| <i>Healthcare facility</i>   |            |           |         |         |           |         |         |           |         |
| Primary care                 | 1.15       | 0.51-2.60 | 0.743   | 2.00    | 0.74-5.42 | 0.175   | 1.80    | 0.66-4.92 | 0.251   |
| Hospital care                | 1.03       | 0.46-2.31 | 0.952   | 1.56    | 0.59-4.14 | 0.374   | 1.46    | 0.55-3.90 | 0.451   |
| Other                        | 1          |           |         | 1       |           |         | 1       |           |         |
| <i>Hierarchical position</i> |            |           |         |         |           |         |         |           |         |
| Physicians in training       | 1.01       | 0.66-1.55 | 0.966   | 1.63    | 0.84-3.19 | 0.117   | 1.80    | 0.66-4.92 | 0.088   |
| Specialists                  | 0.81       | 0.53-1.23 | 0.322   | 0.84    | 0.47-1.48 | 0.551   | 0.85    | 0.48-1.51 | 0.572   |
| Consultants                  | 1          |           |         | 1       |           |         | 1       |           |         |
| Adverse life events (ref no) | 1.72       | 1.16-2.53 | 0.006   | 1.73    | 1.13-2.63 | 0.029   | 1.60    | 1.04-2.44 | 0.031   |
| Women (ref men)              | 2.31       | 1.58-3.38 | <0.001  | 2.34    | 1.55-3.53 | <0.001  | 2.14    | 1.41-3.25 | <0.001  |
| Age                          | 1.01       | 0.99-1.03 | 0.086   | 1.03    | 1.01-1.06 | 0.005   | 1.03    | 1.01-1.06 | 0.004   |
| Nagelkerke R                 |            |           |         | 0.084   |           |         | 0.099   |           |         |

|        |  |         |         |
|--------|--|---------|---------|
| Log LL |  | 838.746 | 835.092 |
|--------|--|---------|---------|

Table S3. The association between severe burnout and major depression, respectively, and all-cause medically certified sickness absence adjusted for working with COVID-19 patients, difficult life events, work hours, healthcare facility, hierarchical position, sex and age

| Exposure         | OR   | CI        | p-value | Nagelkerk R <sup>2</sup> |
|------------------|------|-----------|---------|--------------------------|
| Severe burnout   | 3.12 | 1.70-5.74 | <0.001  | 0.076                    |
| Major Depression | 2.46 | 1.21-4.98 | 0.012   | 0.075                    |

Table S4. The association between exhaustion, mental distance, emotional impairment, and cognitive impairment, respectively, and all-cause medically certified sickness absence adjusted for depression, working with COVID-19 patients, difficult life events, work hours, healthcare facility, hierarchical position, sex and age

| Exposure             | OR   | CI        | p-value | Nagelkerk R <sup>2</sup> |
|----------------------|------|-----------|---------|--------------------------|
| Exhaustion           | 2.07 | 1.26-3.41 | 0.004   | 0.086                    |
| Mental distance      | 0.84 | 0.27-2.57 | 0.754   | 0.075                    |
| Emotional impairment | 3.01 | 1.38-6.59 | 0.006   | 0.085                    |
| Cognitive impairment | 3.62 | 1.79-7.31 | <0.001  | 0.092                    |
